# Supplementary material
Source: MDPI journal article supplement (https://www.mdpi.com/2304-6767/11/5/135)
Supplement: s1 [file s1]

**Suppl. Table S1.** Initial values of surface roughness (Ra)

| Brand      | Side   | MEDIAN   | Q1       | Q3       | IQR      |
|------------|--------|----------|----------|----------|----------|
| Track A    | Top    | 0.050667 | 0.045333 | 0.074000 | 0.028667 |
| Essix C+   | Top    | 0.068833 | 0.049333 | 0.081833 | 0.032500 |
| Erkodur A1 | Top    | 0.059667 | 0.050000 | 0.076000 | 0.026000 |
| Biolon     | Top    | 0.064667 | 0.056500 | 0.073333 | 0.016833 |
| Track A    | Bottom | 0.245333 | 0.081833 | 0.366333 | 0.284500 |
| Essix C+   | Bottom | 0.464500 | 0.358667 | 0.598667 | 0.240000 |
| Erkodur A1 | Bottom | 0.629333 | 0.480000 | 0.728000 | 0.248000 |
| Biolon     | Bottom | 0.522167 | 0.415500 | 0.598000 | 0.182500 |

**Suppl. Table S2.** Descriptive statistics of surface roughness values (Ra) after thermocycling and brushing with three different toothbrushes on the top side of specimens

| Brand      | Description                    | MEDIAN   | Q1       | Q3       | IQR      |
|------------|--------------------------------|----------|----------|----------|----------|
| Track A    | Ra after thermocycling         | 0.448333 | 0.374000 | 0.565667 | 0.191667 |
|            | Ra after brushing with CS 5960 | 0.877333 | 0.613000 | 1.119000 | 0.506000 |
|            | Ra after brushing with CS 3960 | 0.904000 | 0.629000 | 1.336667 | 0.707667 |
|            | Ra after brushing with CS 1560 | 1.038000 | 0.921000 | 1.516000 | 0.595000 |
| Essix C+   | Ra after thermocycling         | 0.438167 | 0.388333 | 0.557500 | 0.169167 |
|            | Ra after brushing with CS 5960 | 0.478500 | 0.366667 | 0.566667 | 0.200000 |
|            | Ra after brushing with CS 3960 | 0.786833 | 0.693000 | 0.868333 | 0.175333 |
|            | Ra after brushing with CS 1560 | 0.907833 | 0.665000 | 1.067000 | 0.402000 |
| Erkodur A1 | Ra after thermocycling         | 0.499750 | 0.337833 | 0.595500 | 0.257667 |
|            | Ra after brushing with CS 5960 | 0.473333 | 0.311333 | 0.551000 | 0.239667 |
|            | Ra after brushing with CS 3960 | 0.536167 | 0.437667 | 0.672667 | 0.235000 |
|            | Ra after brushing with CS 1560 | 0.744333 | 0.382000 | 1.112667 | 0.730667 |
| Biolon     | Ra after thermocycling         | 0.435333 | 0.348667 | 0.496833 | 0.148167 |
|            | Ra after brushing with CS 5960 | 0.776167 | 0.688333 | 0.821333 | 0.133000 |
|            | Ra after brushing with CS 3960 | 1.164500 | 0.840333 | 1.293333 | 0.453000 |
|            | Ra after brushing with CS 1560 | 1.444833 | 1.212000 | 1.872333 | 0.660333 |

**Suppl. Table S3.** Descriptive statistics of surface roughness change ( $\Delta Ra$ ) after thermocycling and brushing with three different toothbrushes on the bottom side of specimens

| Brand      | Description                             | MEAN      | STDEV    | SD CI - 95% | SD CI + 95% |
|------------|-----------------------------------------|-----------|----------|-------------|-------------|
| Track A    | $\Delta Ra$ after thermocycling         | 1.007181  | 0.363461 | 0.282487    | 0.509848    |
|            | $\Delta Ra$ after brushing with CS 5960 | -0.112889 | 0.533967 | 0.333306    | 1.309614    |
|            | $\Delta Ra$ after brushing with CS 3960 | 0.025560  | 0.410678 | 0.256348    | 1.007234    |
|            | $\Delta Ra$ after brushing with CS 1560 | 0.168111  | 0.525360 | 0.327934    | 1.288505    |
| Essix C+   | $\Delta Ra$ after thermocycling         | 0.591410  | 0.351729 | 0.273368    | 0.493391    |
|            | $\Delta Ra$ after brushing with CS 5960 | -0.030611 | 0.223512 | 0.139518    | 0.548188    |
|            | $\Delta Ra$ after brushing with CS 3960 | -0.031444 | 0.425866 | 0.265829    | 1.044486    |
|            | $\Delta Ra$ after brushing with CS 1560 | 0.437833  | 0.346017 | 0.215987    | 0.848646    |
| Erkodur A1 | $\Delta Ra$ after thermocycling         | 0.439514  | 0.540164 | 0.417760    | 0.764522    |
|            | $\Delta Ra$ after brushing with CS 5960 | 0.156667  | 0.207555 | 0.129558    | 0.509053    |
|            | $\Delta Ra$ after brushing with CS 3960 | 0.034528  | 0.658495 | 0.411038    | 1.615035    |
|            | $\Delta Ra$ after brushing with CS 1560 | -0.051600 | 0.367234 | 0.220022    | 1.055267    |
| Biolon     | $\Delta Ra$ after thermocycling         | 0.642262  | 0.298352 | 0.231883    | 0.418516    |
|            | $\Delta Ra$ after brushing with CS 5960 | 0.045368  | 0.841922 | 0.525534    | 2.064909    |
|            | $\Delta Ra$ after brushing with CS 3960 | 0.503327  | 0.613261 | 0.382803    | 1.504093    |
|            | $\Delta Ra$ after brushing with CS 1560 | 1.094865  | 0.582062 | 0.363328    | 1.427573    |
